# Supplementary material for: Dietary Patterns and Associations with Myopia in Chinese Children
Source: MDPI journal article supplement (doi:10.3390/nu15081946), 2023-04-18
Supplement: s1 [file s1]

**Table S1.** General characteristics of participants according to quartiles of the dietary patterns

| Parameter<br>s    | A dietary pattern scores |                 |               |                 |                       | B dietary pattern scores |                 |                 |               |                       | C dietary pattern scores |                 |               |                 |                       |
|-------------------|--------------------------|-----------------|---------------|-----------------|-----------------------|--------------------------|-----------------|-----------------|---------------|-----------------------|--------------------------|-----------------|---------------|-----------------|-----------------------|
|                   | Q1                       | Q2              | Q3            | Q4              | <i>P</i> for<br>trend | Q1                       | Q2              | Q3              | Q4            | <i>P</i> for<br>trend | Q1                       | Q2              | Q3            | Q4              | <i>P</i> for<br>trend |
| Number<br>(n)     | 1858                     | 1857            | 1859          | 1857            |                       | 1857                     | 1858            | 1858            | 1858          |                       | 1858                     | 1858            | 1858          | 1857            |                       |
| Sex (%)           |                          |                 |               |                 | 0.565                 |                          |                 |                 |               | 0.302                 |                          |                 |               |                 | 0.510                 |
| Boy               | 939(50.<br>5)            | 919(49.<br>5)   | 902(48.<br>5) | 963(51.<br>9)   |                       | 904(48.<br>7)            | 932(50.<br>2)   | 958(51.<br>6)   | 929(50.<br>0) |                       | 919(49.<br>5)            | 980(52.<br>7)   | 900(48.<br>4) | 924(49.<br>8)   |                       |
| Girl              | 919(49.<br>5)            | 938(50.<br>5)   | 957(51.<br>5) | 894(48.<br>1)   |                       | 953(51.<br>3)            | 926(49.<br>8)   | 900(48.<br>4)   | 929(50.<br>0) |                       | 939(50.<br>5)            | 878(47.<br>3)   | 958(51.<br>6) | 933(50.<br>2)   |                       |
| Age (%)           |                          |                 |               |                 | 0.182                 |                          |                 |                 |               | 0.001<br>*            |                          |                 |               |                 | 0.490                 |
| 10                | 899(48.<br>4)            | 937(50.<br>5)   | 906(48.<br>7) | 952(51.<br>3)   |                       | 970(52.<br>2)            | 930(50.<br>1)   | 928(49.<br>9)   | 866(46.<br>6) |                       | 906(48.<br>8)            | 959(51.<br>6)   | 939(50.<br>5) | 890(47.<br>9)   |                       |
| 11                | 959(51.<br>6)            | 920(49.<br>5)   | 953(51.<br>3) | 905(48.<br>7)   |                       | 887(47.<br>8)            | 928(49.<br>9)   | 930(50.<br>1)   | 992(53.<br>4) |                       | 952(51.<br>2)            | 899(48.<br>4)   | 919(49.<br>5) | 967(52.<br>1)   |                       |
| Residency<br>(%)  |                          |                 |               |                 | <0.00<br>1*           |                          |                 |                 |               | 0.007<br>*            |                          |                 |               |                 | 0.162                 |
| Urban             | 537(28.<br>9)            | 641(34.<br>6)   | 886(47.<br>7) | 1070(57.<br>.6) |                       | 816(43.<br>9)            | 700(37.<br>7)   | 724(39.<br>0)   | 894(48.<br>2) |                       | 776(41.<br>8)            | 711(38.<br>3)   | 884(47.<br>6) | 763(41.<br>1)   |                       |
| Rural             | 1320(71.<br>.1)          | 1214(65.<br>.4) | 973(52.<br>3) | 787(42.<br>4)   |                       | 1041(56.<br>.1)          | 1151(62.<br>.3) | 1134(61.<br>.0) | 962(51.<br>8) |                       | 1080(58.<br>.2)          | 1147(61.<br>.7) | 973(52.<br>4) | 1094(58.<br>.9) |                       |
| Region<br>(%)     |                          |                 |               |                 | <0.00<br>1*           |                          |                 |                 |               | <0.00<br>1*           |                          |                 |               |                 | 0.007<br>*            |
| Northern<br>China | 1084(58.<br>.4)          | 1101(59.<br>.4) | 830(44.<br>6) | 758(40.<br>8)   |                       | 823(44.<br>3)            | 958(51.<br>6)   | 1043(56.<br>.1) | 949(51.<br>1) |                       | 856(46.<br>1)            | 1019(54.<br>.8) | 924(49.<br>8) | 974(52.<br>5)   |                       |

|                                                    |            |            |            |            |        |            |            |            |            |        |            |            |            |            |         |
|----------------------------------------------------|------------|------------|------------|------------|--------|------------|------------|------------|------------|--------|------------|------------|------------|------------|---------|
| Southern China                                     | 773(41.6)  | 754(40.6)  | 1029(55.4) | 1099(59.2) |        | 1034(55.7) | 899(48.4)  | 815(43.9)  | 907(48.9)  |        | 1000(53.9) | 839(54.2)  | 933(50.2)  | 883(47.5)  |         |
| Nutrition status (%)                               |            |            |            |            | 0.022* |            |            |            |            | 0.825  |            |            |            |            | <0.001* |
| Stunting and wasting                               | 126(6.9)   | 117(6.4)   | 124(6.8)   | 132(7.2)   |        | 120(6.6)   | 132(7.2)   | 123(6.7)   | 124(6.8)   |        | 168(9.2)   | 114(6.2)   | 132(7.2)   | 85(4.6)    |         |
| Normal                                             | 1217(66.6) | 1163(63.7) | 1115(60.8) | 1133(62.2) |        | 1136(62.1) | 1195(65.3) | 1144(62.7) | 1153(63.2) |        | 1188(65.1) | 1180(64.5) | 1162(63.7) | 1098(59.9) |         |
| Overweight and obesity                             | 484(26.5)  | 546(29.9)  | 595(32.4)  | 557(30.6)  |        | 573(31.3)  | 504(27.5)  | 559(30.6)  | 546(30.0)  |        | 468(25.7)  | 535(29.3)  | 530(29.1)  | 649(35.4)  |         |
| Moderate-to high-intensity physical activity (d/w) |            |            |            |            | 0.114  |            |            |            |            | 0.036* |            |            |            |            | <0.001* |
| 0                                                  | 627(33.8)  | 593(32.0)  | 573(30.9)  | 603(32.5)  |        | 586(31.6)  | 613(33.0)  | 580(31.3)  | 617(33.2)  |        | 494(26.6)  | 593(32.0)  | 690(37.2)  | 619(33.3)  |         |
| 1                                                  | 273(14.7)  | 355(19.1)  | 364(19.6)  | 311(16.7)  |        | 322(17.3)  | 326(17.6)  | 328(17.7)  | 327(17.6)  |        | 316(17.0)  | 333(18.0)  | 347(18.7)  | 307(16.5)  |         |
| 2                                                  | 362(19.5)  | 458(24.7)  | 550(29.6)  | 461(24.8)  |        | 424(22.8)  | 425(22.9)  | 488(26.3)  | 494(26.6)  |        | 534(28.8)  | 458(24.7)  | 421(22.7)  | 418(22.5)  |         |
| ≥3                                                 | 595(32.0)  | 450(24.2)  | 368(19.8)  | 482(26.0)  |        | 524(28.2)  | 492(26.5)  | 459(24.7)  | 420(22.6)  |        | 512(27.6)  | 471(25.4)  | 399(21.5)  | 513(27.6)  |         |
| screen time (min/d)                                |            |            |            |            | 0.010* |            |            |            |            | 0.001* |            |            |            |            | 0.670   |
| 0                                                  | 1(0.1)     | 4(0.2)     | 4(0.2)     | 6(0.3)     |        | 7(0.4)     | 1(0.1)     | 2(0.1)     | 5(0.3)     |        | 2(0.1)     | 0(0.0)     | 0(0.0)     | 13(0.7)    |         |

|                    |                |                |                |                |       |                |                |                |                |       |                |                |                |                |             |
|--------------------|----------------|----------------|----------------|----------------|-------|----------------|----------------|----------------|----------------|-------|----------------|----------------|----------------|----------------|-------------|
| >0~<60             | 1277(68<br>.7) | 1288(69<br>.4) | 1287(69<br>.3) | 1343(72<br>.3) |       | 1359(73<br>.3) | 1254(67<br>.5) | 1347(72<br>.6) | 1235(66<br>.5) |       | 1261(68<br>.0) | 1358(73<br>.1) | 1344(72<br>.3) | 1232(66<br>.4) |             |
| ≥60                | 580(31.<br>2)  | 563(30.<br>4)  | 565(30.<br>4)  | 508(27.<br>4)  |       | 489(26.<br>4)  | 603(32.<br>5)  | 507(27.<br>3)  | 617(33.<br>2)  |       | 592(31.<br>9)  | 499(26.<br>9)  | 514(27.<br>7)  | 611(32.<br>9)  |             |
| Sleep<br>time(h/w) |                |                |                |                | 0.213 |                |                |                |                | 0.929 |                |                |                |                | <0.00<br>1* |
| ≤9                 | 580(31.<br>2)  | 531(28.<br>6)  | 639(34.<br>4)  | 581(31.<br>3)  |       | 516(27.<br>8)  | 675(36.<br>3)  | 602(32.<br>4)  | 538(29.<br>0)  |       | 710(38.<br>2)  | 555(29.<br>9)  | 545(29.<br>3)  | 521(28.<br>1)  |             |
| >9                 | 1278(68<br>.8) | 1326(71<br>.4) | 1220(65<br>.6) | 1276(68<br>.7) |       | 1341(72<br>.2) | 1183(63<br>.7) | 1256(67<br>.6) | 1350(71<br>.0) |       | 1148(61<br>.8) | 1303(70<br>.1) | 1313(70<br>.7) | 1336(71<br>.9) |             |

*P* for trend was based on a linear trend test across the quartiles of dietary pattern scores (Q1–Q4), \* *P* < 0.05.
